# Supplementary material for: Metabolic switch from glycogen to lipid in the liver maintains glucose homeostasis in neonatal mice
Source: PubMed Central journal article supplement (PMC10568567; doi:10.1016/j.jlr.2023.100440), 2023-10-11

Supplementary Fig. 1

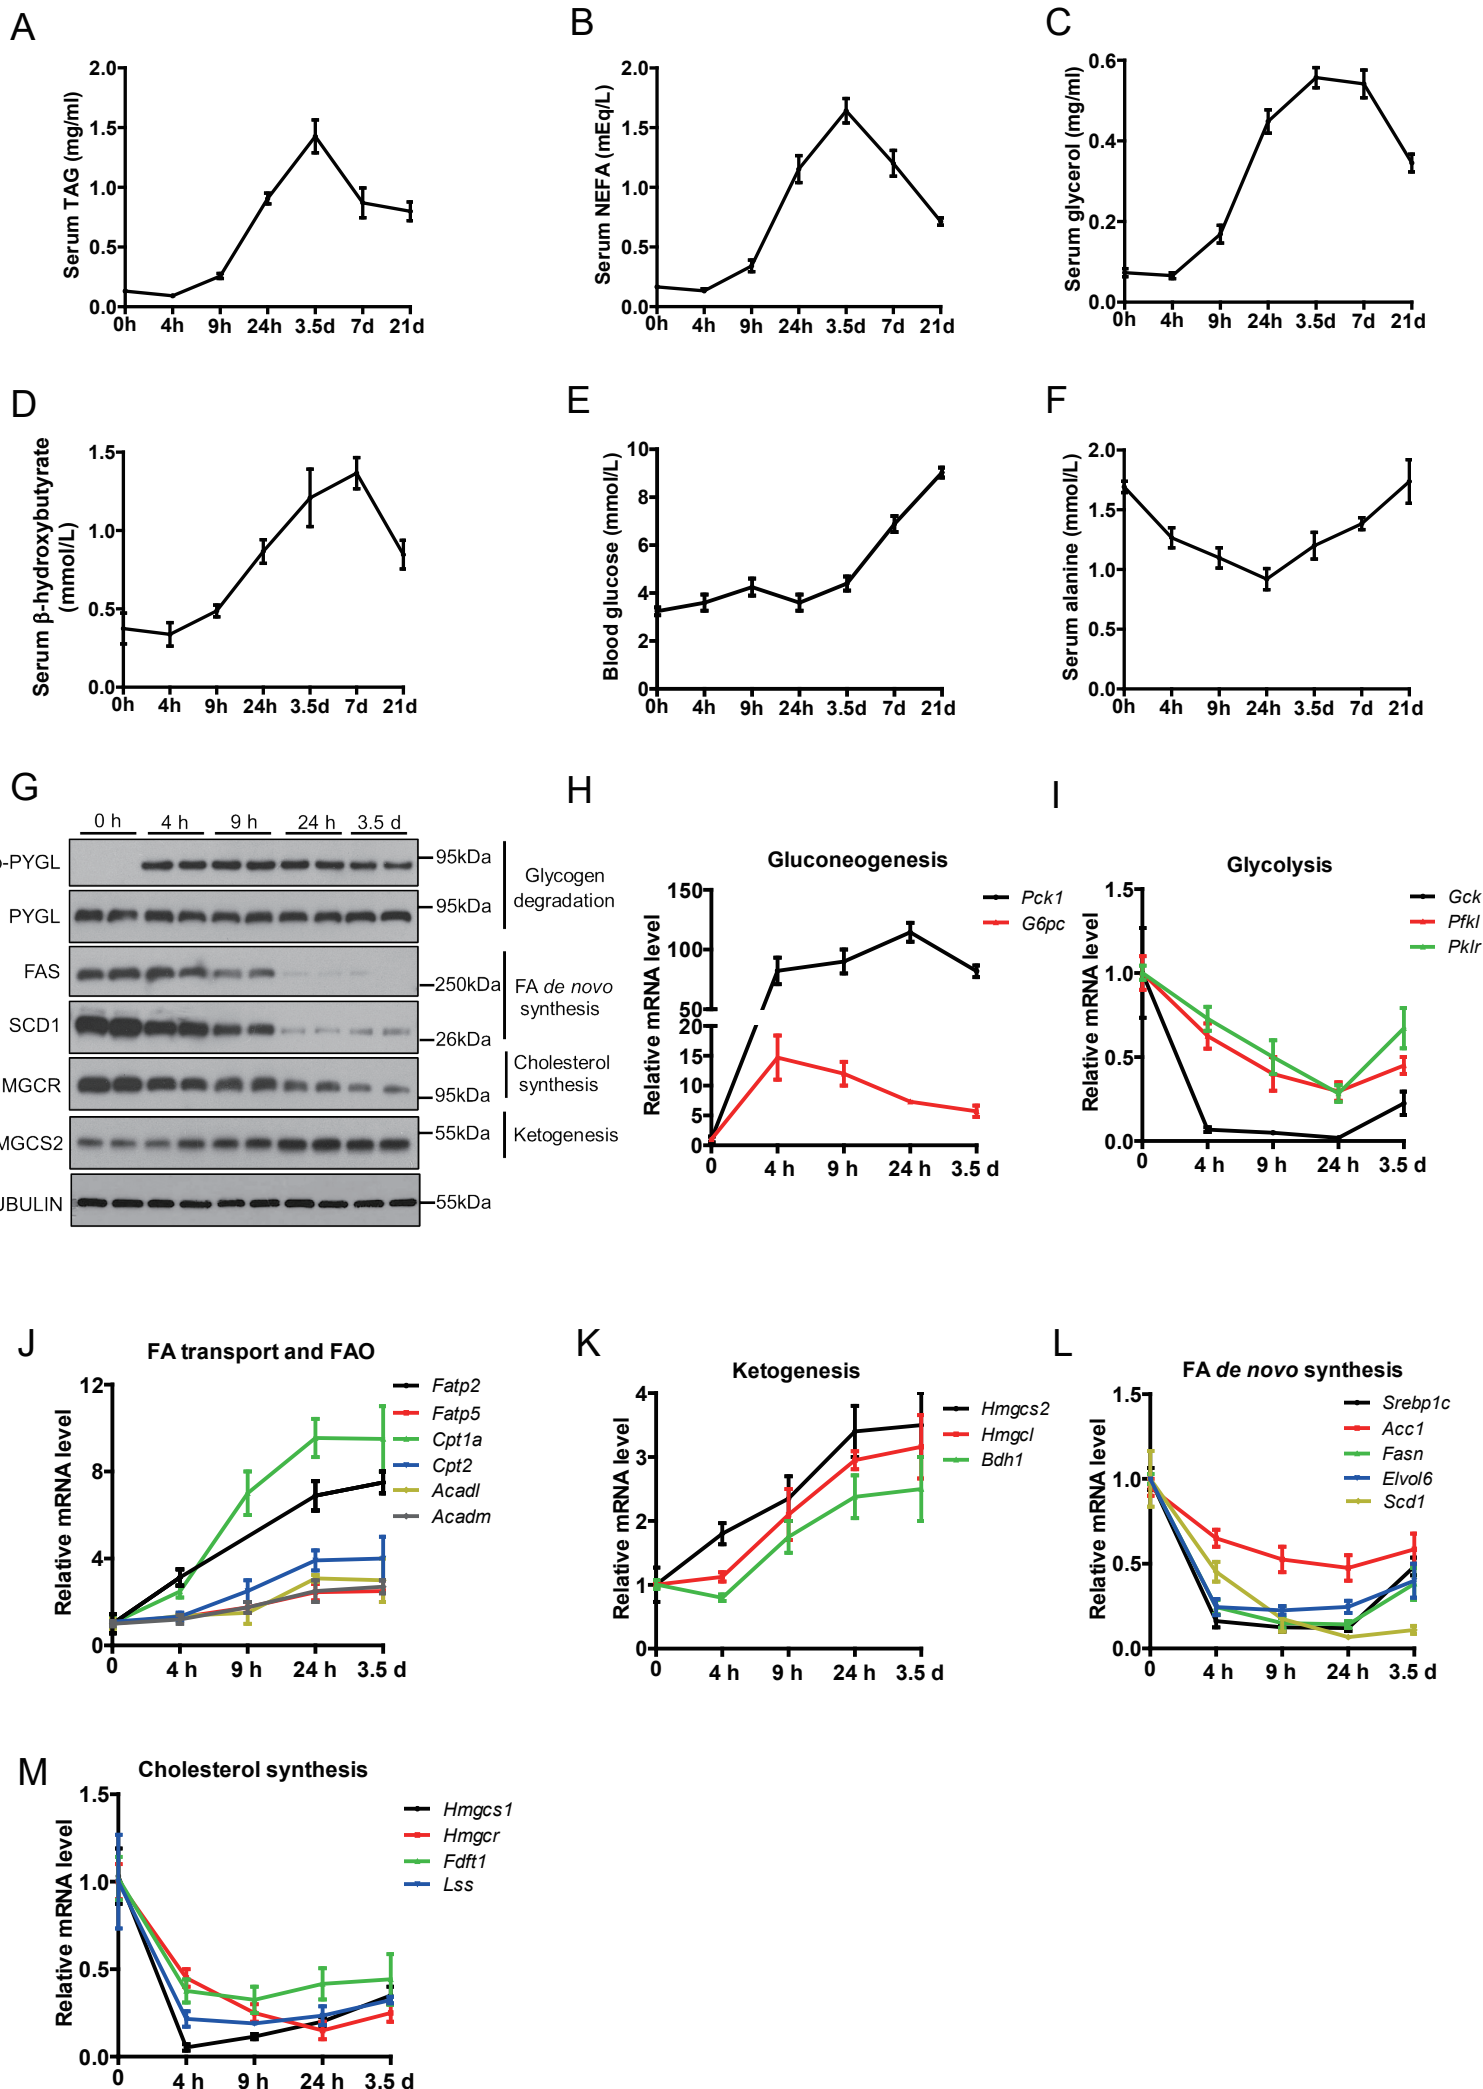

Supplement: mmc1.pdf [file mmc1.pdf]
