# Supplementary material for: Metabolic switch from glycogen to lipid in the liver maintains glucose homeostasis in neonatal mice
Source: PubMed Central journal article supplement (PMC10568567; doi:10.1016/j.jlr.2023.100440), 2023-10-11

Supplementary Fig. 3

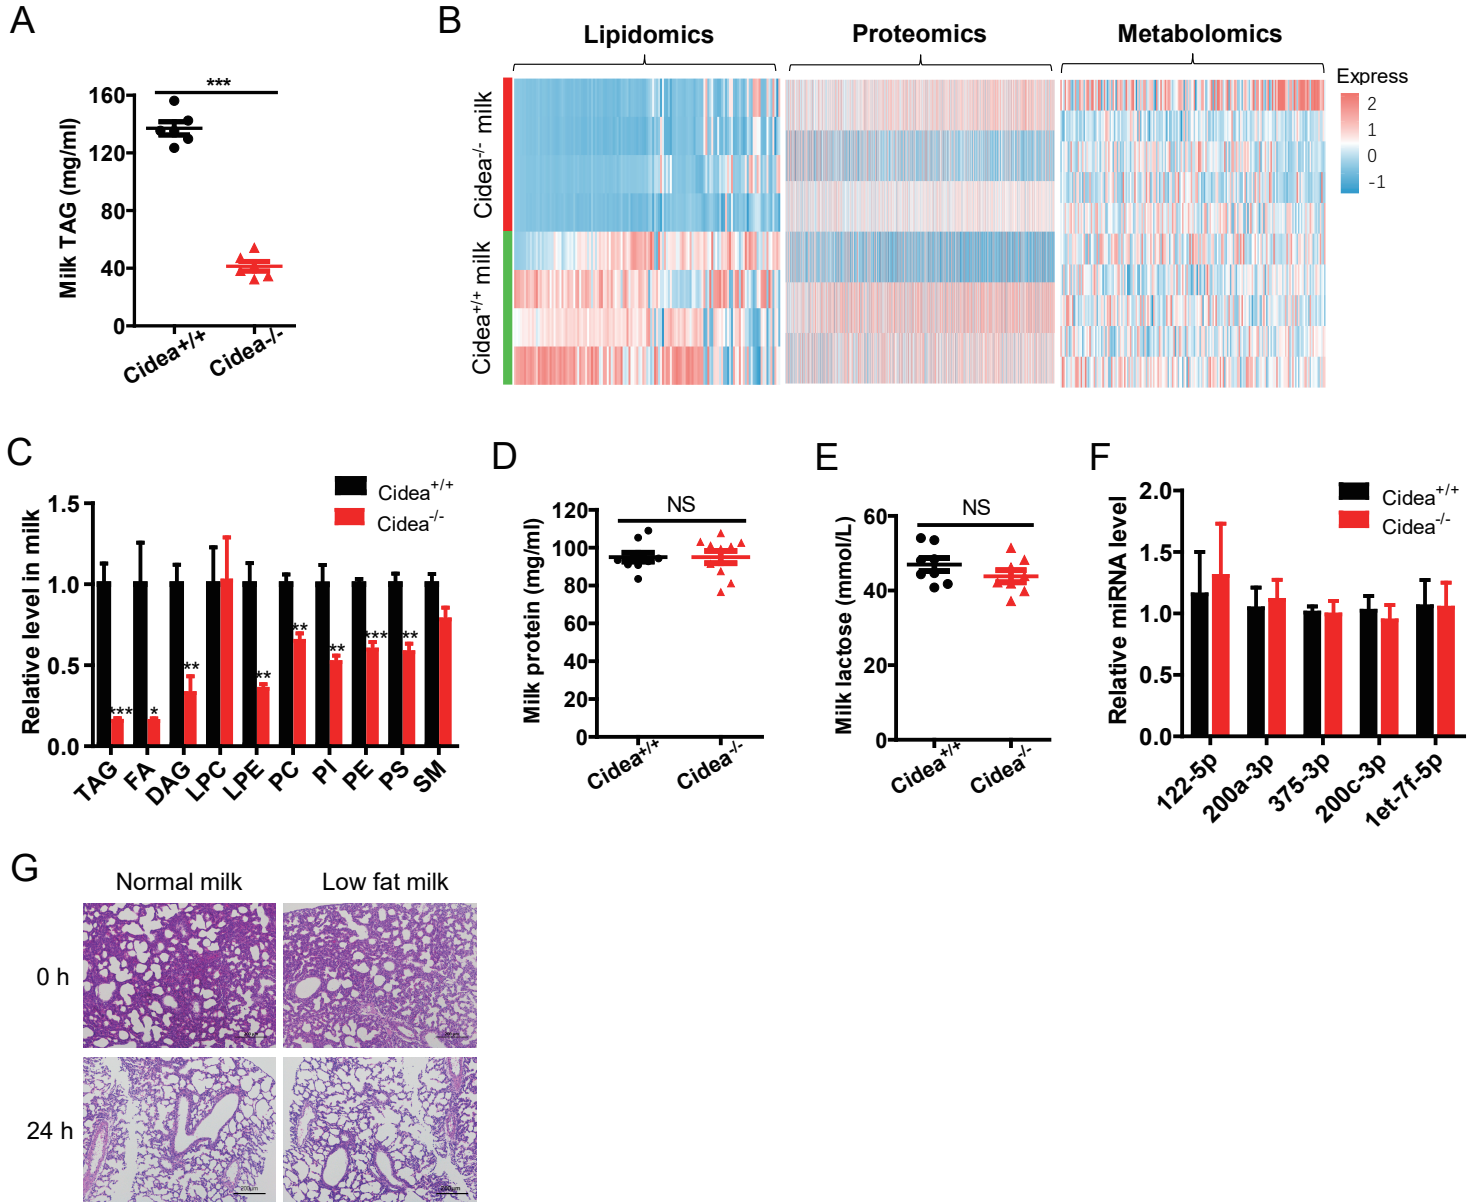

Supplement: mmc3.pdf [file mmc3.pdf]
