# Supplementary material for: Metabolic switch from glycogen to lipid in the liver maintains glucose homeostasis in neonatal mice
Source: PubMed Central journal article supplement (PMC10568567; doi:10.1016/j.jlr.2023.100440), 2023-10-11
Supplement: mmc4.pdf [file mmc4.pdf]

Supplementary Table 1. Sequences of primers used for qRT-PCR analysis.

|                | Forward (5'-3')          | Reverse (5'-3')         |
|----------------|--------------------------|-------------------------|
| <i>Actin</i>   | GGCTGTATCCCCTCCATCG      | CCAGTTGGTAACAATGCCATGT  |
| <i>Ppara</i>   | ACGGCAATGGCTTTATCA       | CGCTGCGTCGGACTCGGT      |
| <i>Fatp2</i>   | TCCTCCAAGATGTGCGGTACT    | TAGGTGAGCGTCTCGTCTCG    |
| <i>Fatp5</i>   | CTACGCTGGCTGCATATAGATG   | CCACAAAGGTCTCTGGAGGAT   |
| <i>Cpt1a</i>   | ACCACTGGCCGCATGT         | CTCCATGGCGTAGTAGTTGCT   |
| <i>Cpt2</i>    | CAGCACAGCATCGTACCCA      | TCCAATGCCGTTCTCAAAT     |
| <i>Cox4</i>    | CGGCGTGACTACCCCTTG       | TGAGGGATGGGGCCATACA     |
| <i>Cyto C</i>  | CCAAATCTCCACGGTCTGTTC    | ATCAGGGTATCCTCTCCCCAG   |
| <i>Acadl</i>   | GCATCAACATCGCAGAGAAA     | ACGCTTGCTCTTCCCAAGTA    |
| <i>Acadm</i>   | GCTAGTGGAGCACCAAGGAG     | CCAGGCTGCTCTCTGGTAAC    |
| <i>Pck1</i>    | GAAGGACAAAGATGGCAAGTT    | CGTTTTCTTAGGGATGTAGC    |
| <i>G6pc</i>    | CTGAGCGCGGGCATCATAAT     | GATTCTTAGGATCGCCCAGAAAG |
| <i>Hmgcs2</i>  | GAAGAGAGCGATGCAGGAAAC    | GTCCACATATTGGGCTGGAAA   |
| <i>Hmgcl</i>   | CAGGTGAAGATCGTGGAAGTC    | GGAGCCCTGCTTCGGAAC      |
| <i>Bdh1</i>    | ACAAGACACACGCTGTTGTTT    | CTCTTCAAGCTGTCCAGTTCC   |
| <i>Gck</i>     | GTCTTTTGCAACACTCAGCCA    | ATCCGGCTCATCACCTTCTTC   |
| <i>Pfkf</i>    | GGAGGCGAGAACATCAAGCC     | CGGCCTTCCCTCGTAGTGA     |
| <i>Pklr</i>    | TGGCATCGAAAGTGGAAGC      | GATGTGGGACTATGGGAGGG    |
| <i>Srebp1c</i> | GGAGCCATGGATTGCACATT     | GCTTCCAGAGAGGAGGCCAG    |
| <i>Acc1</i>    | AGCTGATCCTGCGAACCT       | GCCAAGCGGATGTAAACT      |
| <i>Fasn</i>    | TCCAAGACTGACTCGGCTACTGAC | GCAGCCAGGTTCGGAATGCTATC |
| <i>Elovl6</i>  | AAGCAGTTCAACGAGAACGAA    | CGTACAGCGCAGAAAACAGG    |
| <i>Scd1</i>    | TTCTTGCGATACTCTGGTGC     | CGGGATTGAATGTTCTTGTCTG  |
| <i>Hmgcs1</i>  | AATTGGGCCAAACGCTCCT      | TCTCGTACAAGAGAACTGGCTA  |
| <i>Hmgcr</i>   | CTGGAATTATGAGTGCCCCAAA   | ACGACTGTACTGAAGACAAAGC  |
| <i>Fdft1</i>   | ATGGAGTTCGTCAAGTGCTAGG   | CGTGCCGTATGTCCCATC      |
| <i>Lss</i>     | TCGTGGGGGACCCTATAAAAC    | CGTCCTCCGCTTGATAATAAGTC |
