# Supplementary material for: Metabolic switch from glycogen to lipid in the liver maintains glucose homeostasis in neonatal mice
Source: PubMed Central journal article supplement (PMC10568567; doi:10.1016/j.jlr.2023.100440), 2023-10-11
Supplement: mmc5.pdf [file mmc5.pdf]

Supplementary Table 2. Serum chemistry of *Pygl<sup>+/+</sup>* and *Pygl<sup>-/-</sup>* mice at 0 h, 4 h, 9 h, 24 h, after birth.  
 (No differences between *Pygl<sup>+/+</sup>* and *Pygl<sup>-/-</sup>* mice)

|      | TAG (mg/ml)               |                           | NEFA (mEq/L)              |                           | Glycerol (mg/ml)          |                           | β-hydroxybutyrate (mmol/L) |                           |
|------|---------------------------|---------------------------|---------------------------|---------------------------|---------------------------|---------------------------|----------------------------|---------------------------|
|      | <i>Pygl<sup>+/+</sup></i> | <i>Pygl<sup>-/-</sup></i> | <i>Pygl<sup>+/+</sup></i> | <i>Pygl<sup>-/-</sup></i> | <i>Pygl<sup>+/+</sup></i> | <i>Pygl<sup>-/-</sup></i> | <i>Pygl<sup>+/+</sup></i>  | <i>Pygl<sup>-/-</sup></i> |
| 0 h  | 0.13±0.02                 | 0.13±0.01                 | 0.18±0.03                 | 0.19±0.02                 | 0.07±0.02                 | 0.08±0.02                 | 0.38±0.03                  | 0.37±0.03                 |
| 4 h  | 0.08±0.02                 | 0.10±0.01                 | 0.14±0.02                 | 0.14±0.02                 | 0.07±0.02                 | 0.05±0.01                 | 0.35±0.05                  | 0.34±0.04                 |
| 9 h  | 0.20±0.03                 | 0.16±0.02                 | 0.35±0.07                 | 0.29±0.04                 | 0.21±0.04                 | 0.17±0.03                 | 0.46±0.04                  | 0.50±0.07                 |
| 24 h | 1.05±0.06                 | 0.95±0.05                 | 1.17±0.19                 | 1.00±0.14                 | 0.49±0.06                 | 0.45±0.08                 | 0.75±0.07                  | 0.72±0.08                 |
